# Supplementary material for: Ancestral male recombination in Drosophila albomicans produced geographically restricted neo-Y chromosome haplotypes varying in age and onset of decay
Source: PubMed Central journal article supplement (PMC6897423; doi:10.1371/journal.pgen.1008502), 2019-11-18
Supplement: pgen.1008502.s005.pdf [file pgen.1008502.s005.pdf]

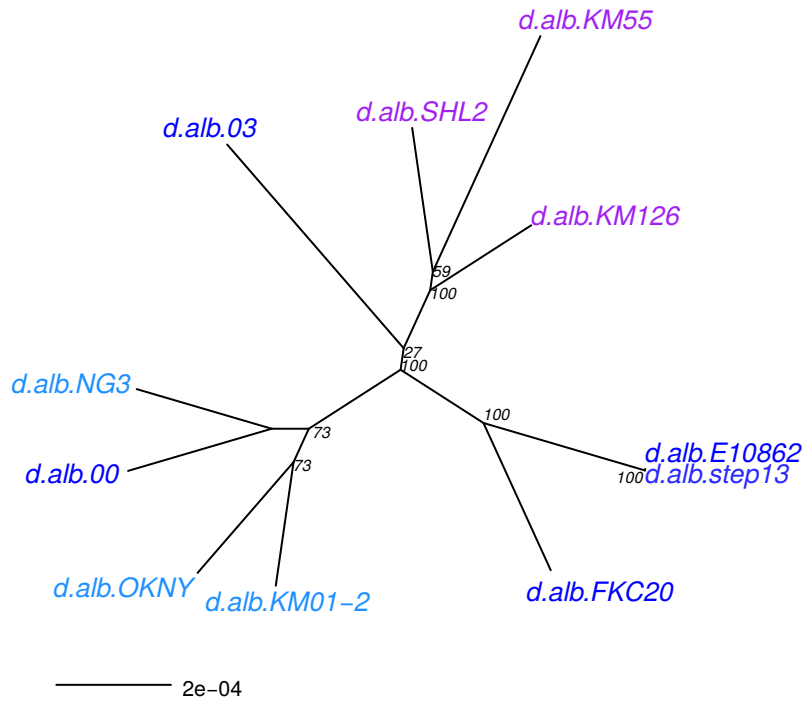

**S1 Fig.** The neo-X phylogeny of strains with neo-Y genotypes. Strains are color coded based on their neo-Y type.
