# Supplementary material for: Ancestral male recombination in Drosophila albomicans produced geographically restricted neo-Y chromosome haplotypes varying in age and onset of decay
Source: PubMed Central journal article supplement (PMC6897423; doi:10.1371/journal.pgen.1008502), 2019-11-18
Supplement: pgen.1008502.s006.pdf [file pgen.1008502.s006.pdf]

**Y1 vs Y3**

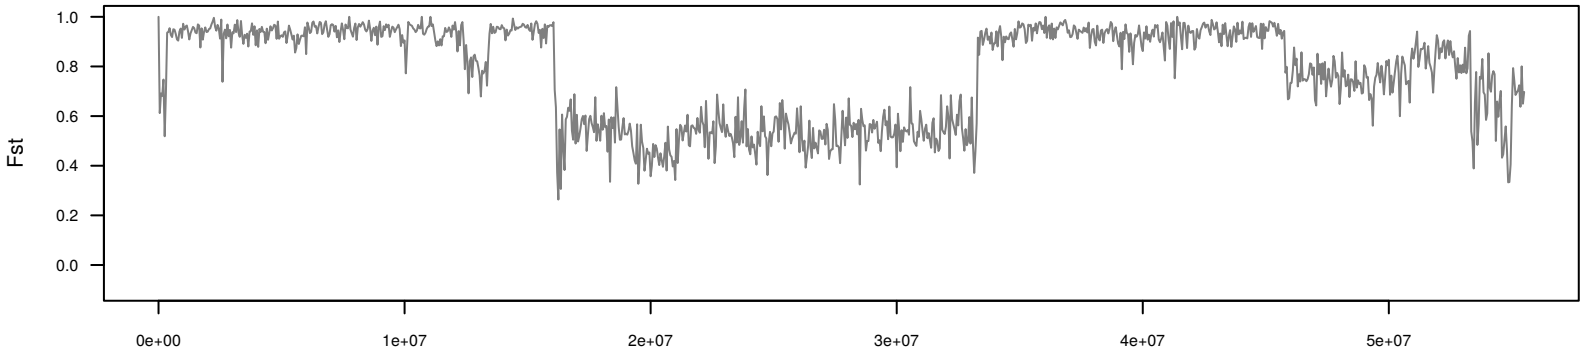

**Y2 vs Y3**

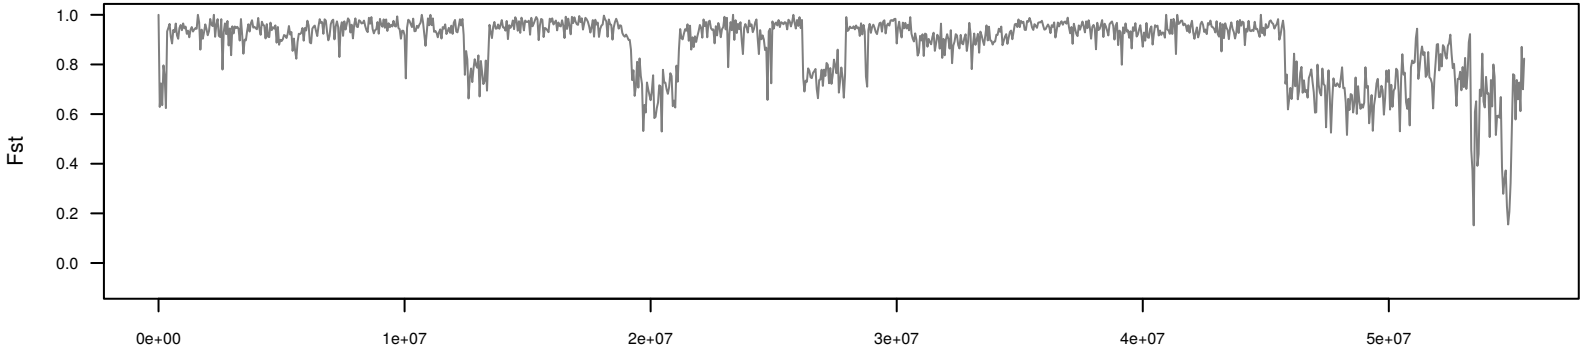

**Y1 vs Y2**

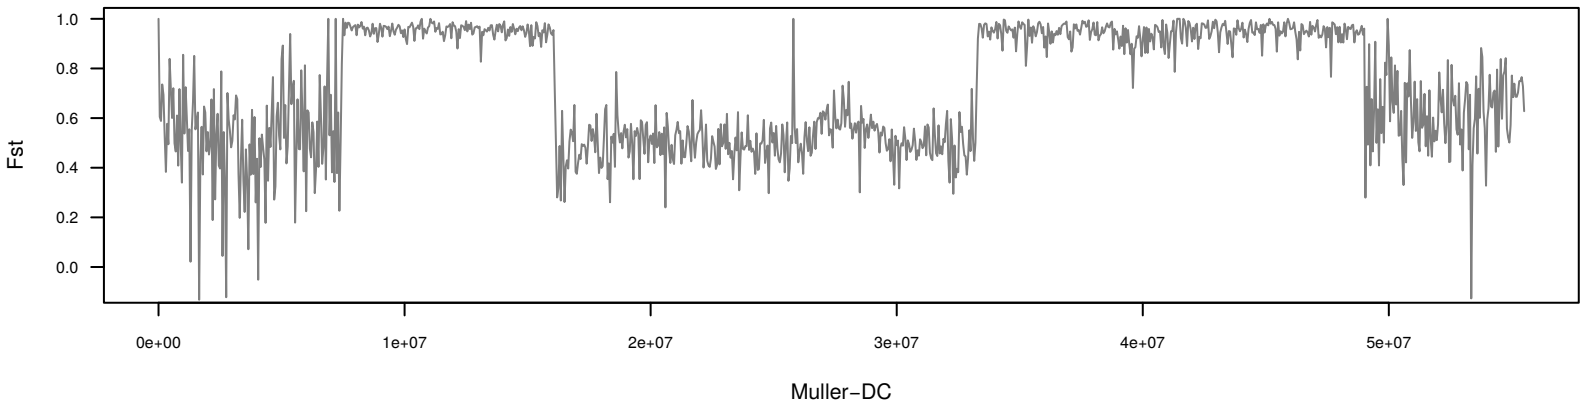

Muller-DC

**S2 Fig.**  $F_{ST}$  between different Y populations
