# Supplementary material for: Ancestral male recombination in Drosophila albomicans produced geographically restricted neo-Y chromosome haplotypes varying in age and onset of decay
Source: PubMed Central journal article supplement (PMC6897423; doi:10.1371/journal.pgen.1008502), 2019-11-18
Supplement: pgen.1008502.s008.pdf [file pgen.1008502.s008.pdf]

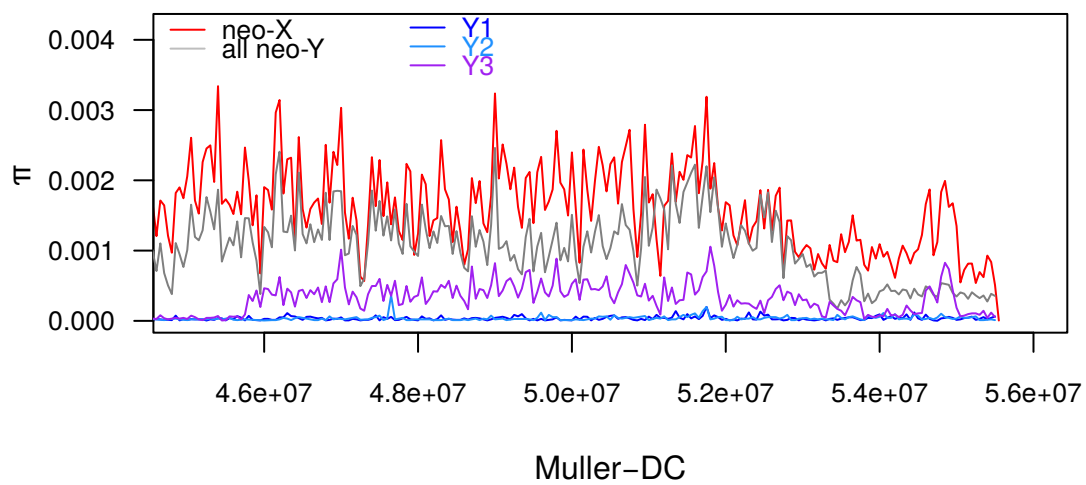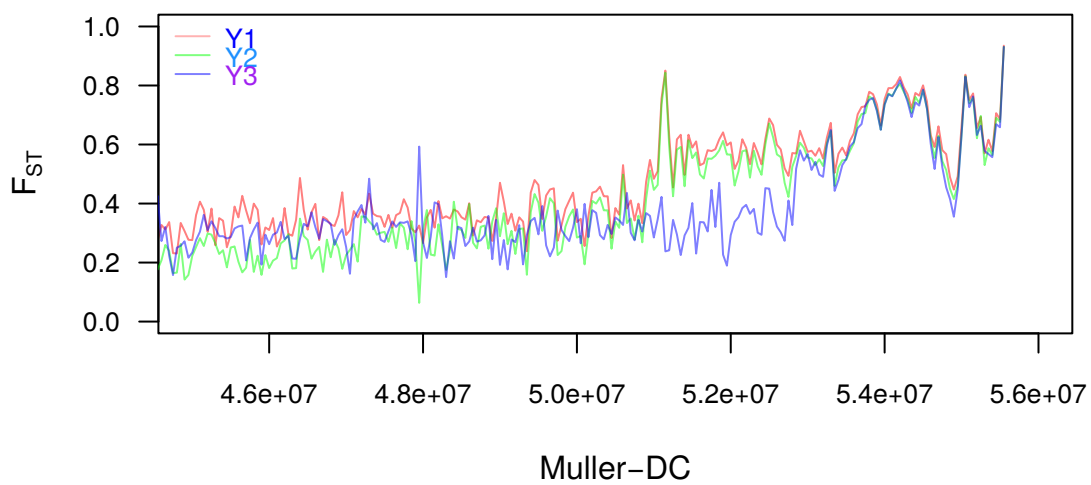

**S4 Fig.**  $F_{ST}$  and  $\pi$  at the centromere proximal region.
