# Supplementary material for: Ancestral male recombination in Drosophila albomicans produced geographically restricted neo-Y chromosome haplotypes varying in age and onset of decay
Source: PubMed Central journal article supplement (PMC6897423; doi:10.1371/journal.pgen.1008502), 2019-11-18
Supplement: pgen.1008502.s009.pdf [file pgen.1008502.s009.pdf]

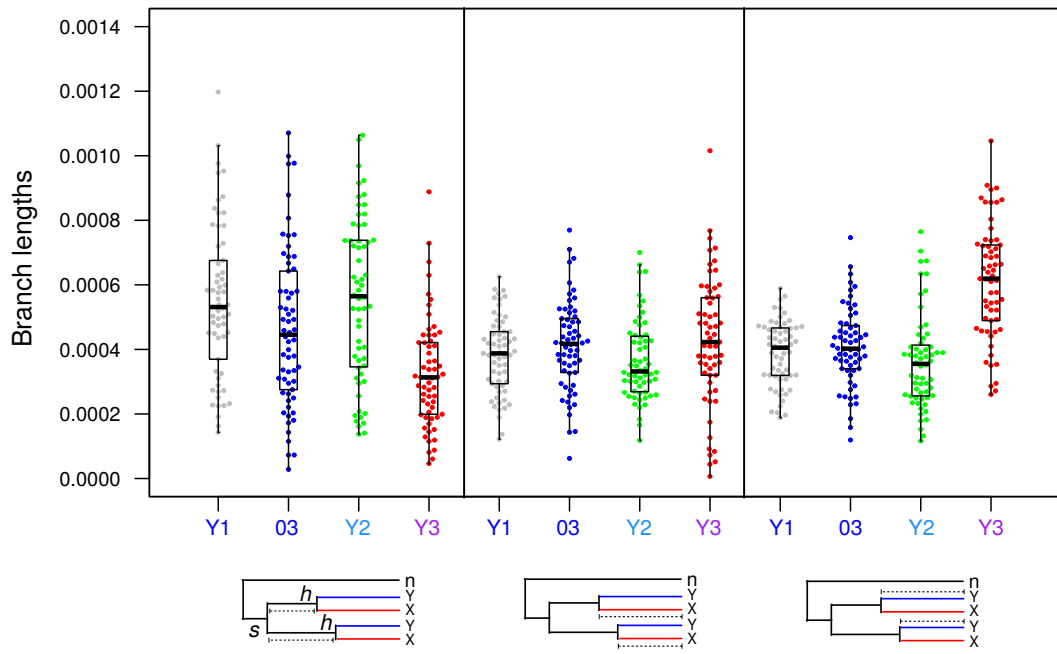

**S5 Fig.** Same as Figure 3C but estimates are restricted to windows between 16.2 Mb and 33.2 Mb, where all Y types have a different haplotype.
