# Supplementary material for: Ancestral male recombination in Drosophila albomicans produced geographically restricted neo-Y chromosome haplotypes varying in age and onset of decay
Source: PubMed Central journal article supplement (PMC6897423; doi:10.1371/journal.pgen.1008502), 2019-11-18
Supplement: pgen.1008502.s010.pdf [file pgen.1008502.s010.pdf]

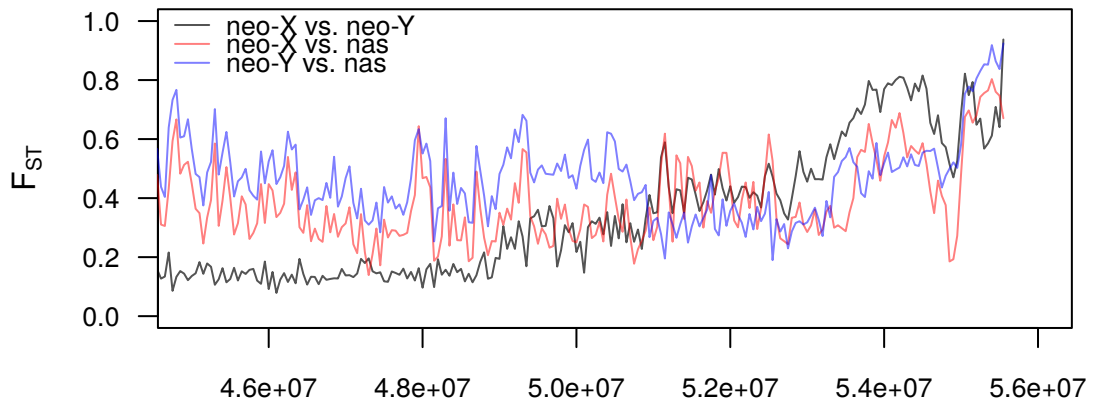

Muller-DC

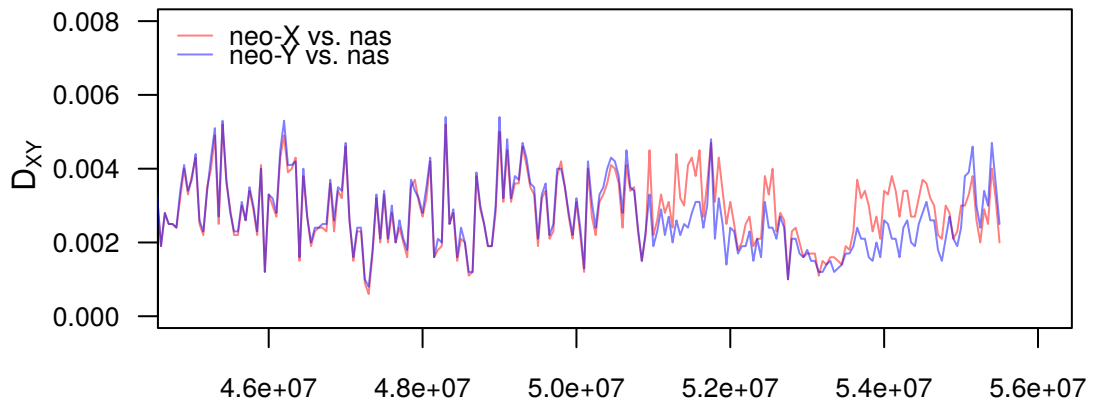

Muller-DC

**S6 Fig.**  $F_{ST}$  and  $D_{XY}$  between the neo-X, neo-Y, and Chr. 3 the centromere proximal region.
