# Supplementary material for: Ancestral male recombination in Drosophila albomicans produced geographically restricted neo-Y chromosome haplotypes varying in age and onset of decay
Source: PubMed Central journal article supplement (PMC6897423; doi:10.1371/journal.pgen.1008502), 2019-11-18
Supplement: pgen.1008502.s011.pdf [file pgen.1008502.s011.pdf]

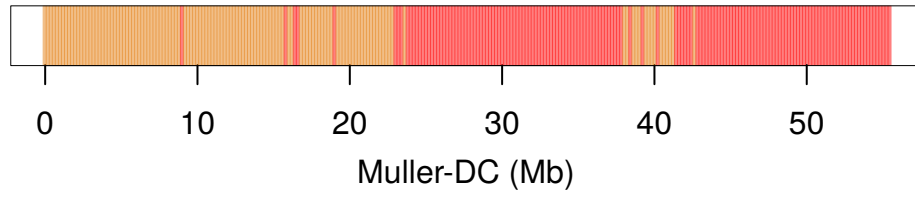

**S7 Fig.** *D. nasuta* introgression on the neo-X of SHL-2. Windows where SHL-2 falls in the *D. albomicans* neo-X clade are colored red. Windows where SHL-2 falls in the *D. nasuta* Chr. 3 clade are colored in yellow.
