# Supplementary material for: Ancestral male recombination in Drosophila albomicans produced geographically restricted neo-Y chromosome haplotypes varying in age and onset of decay
Source: PubMed Central journal article supplement (PMC6897423; doi:10.1371/journal.pgen.1008502), 2019-11-18
Supplement: pgen.1008502.s012.pdf [file pgen.1008502.s012.pdf]

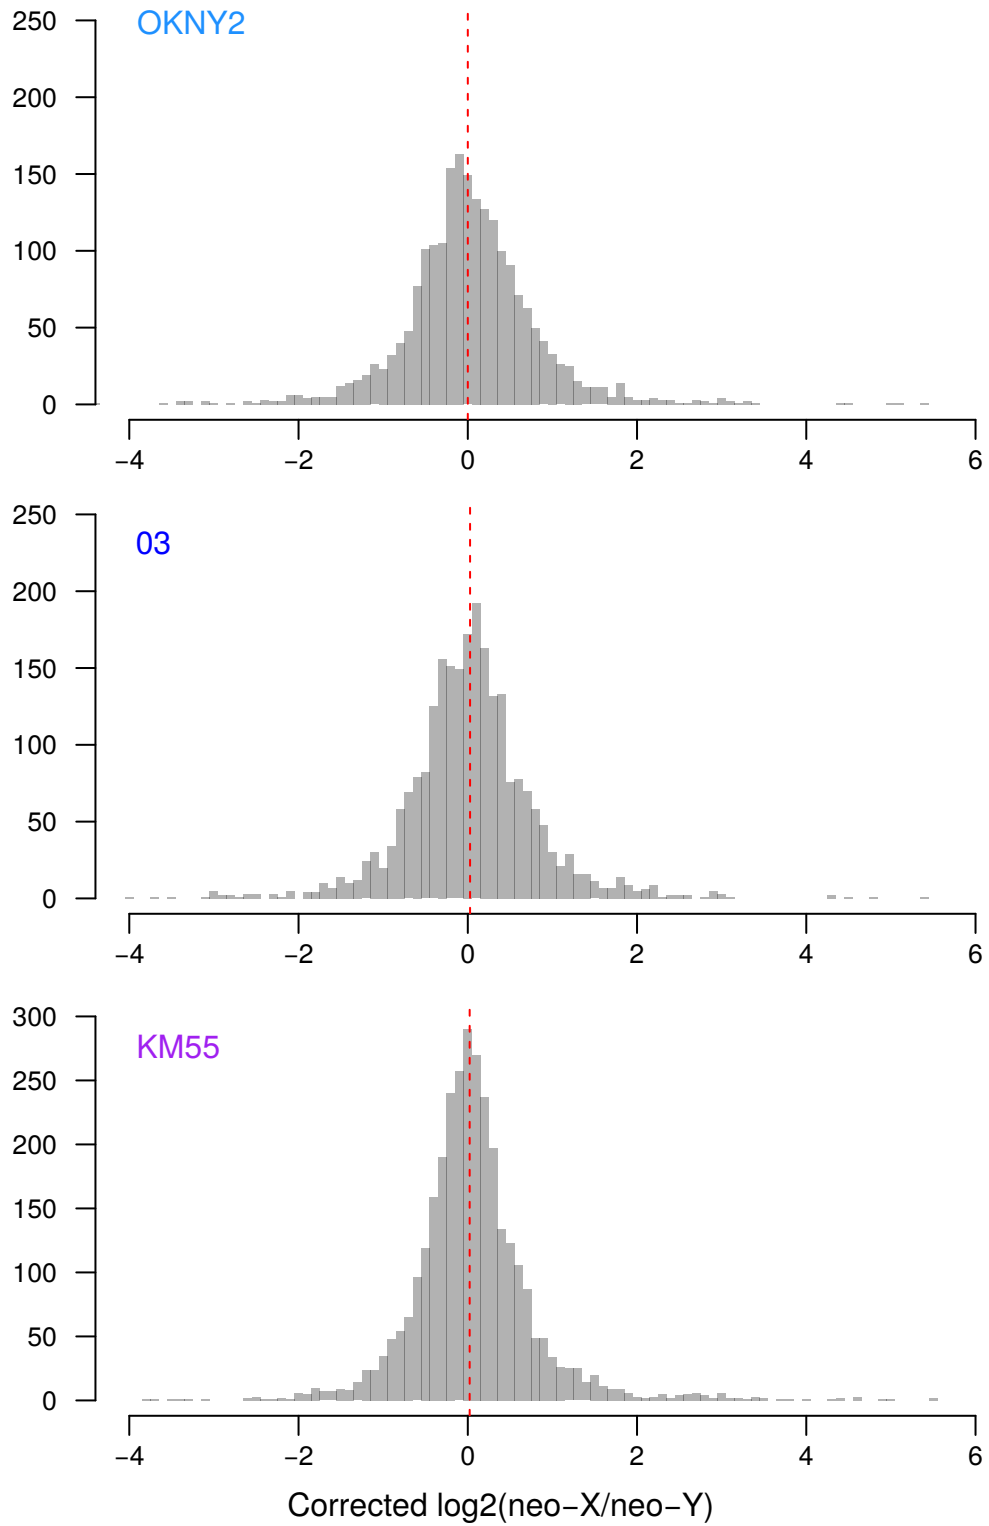

**S8 Fig.** Distribution of allele-specific gene expression across neo-Y chromosomes of different ages.
