# Supplementary material for: Ancestral male recombination in Drosophila albomicans produced geographically restricted neo-Y chromosome haplotypes varying in age and onset of decay
Source: PubMed Central journal article supplement (PMC6897423; doi:10.1371/journal.pgen.1008502), 2019-11-18
Supplement: pgen.1008502.s013.pdf [file pgen.1008502.s013.pdf]

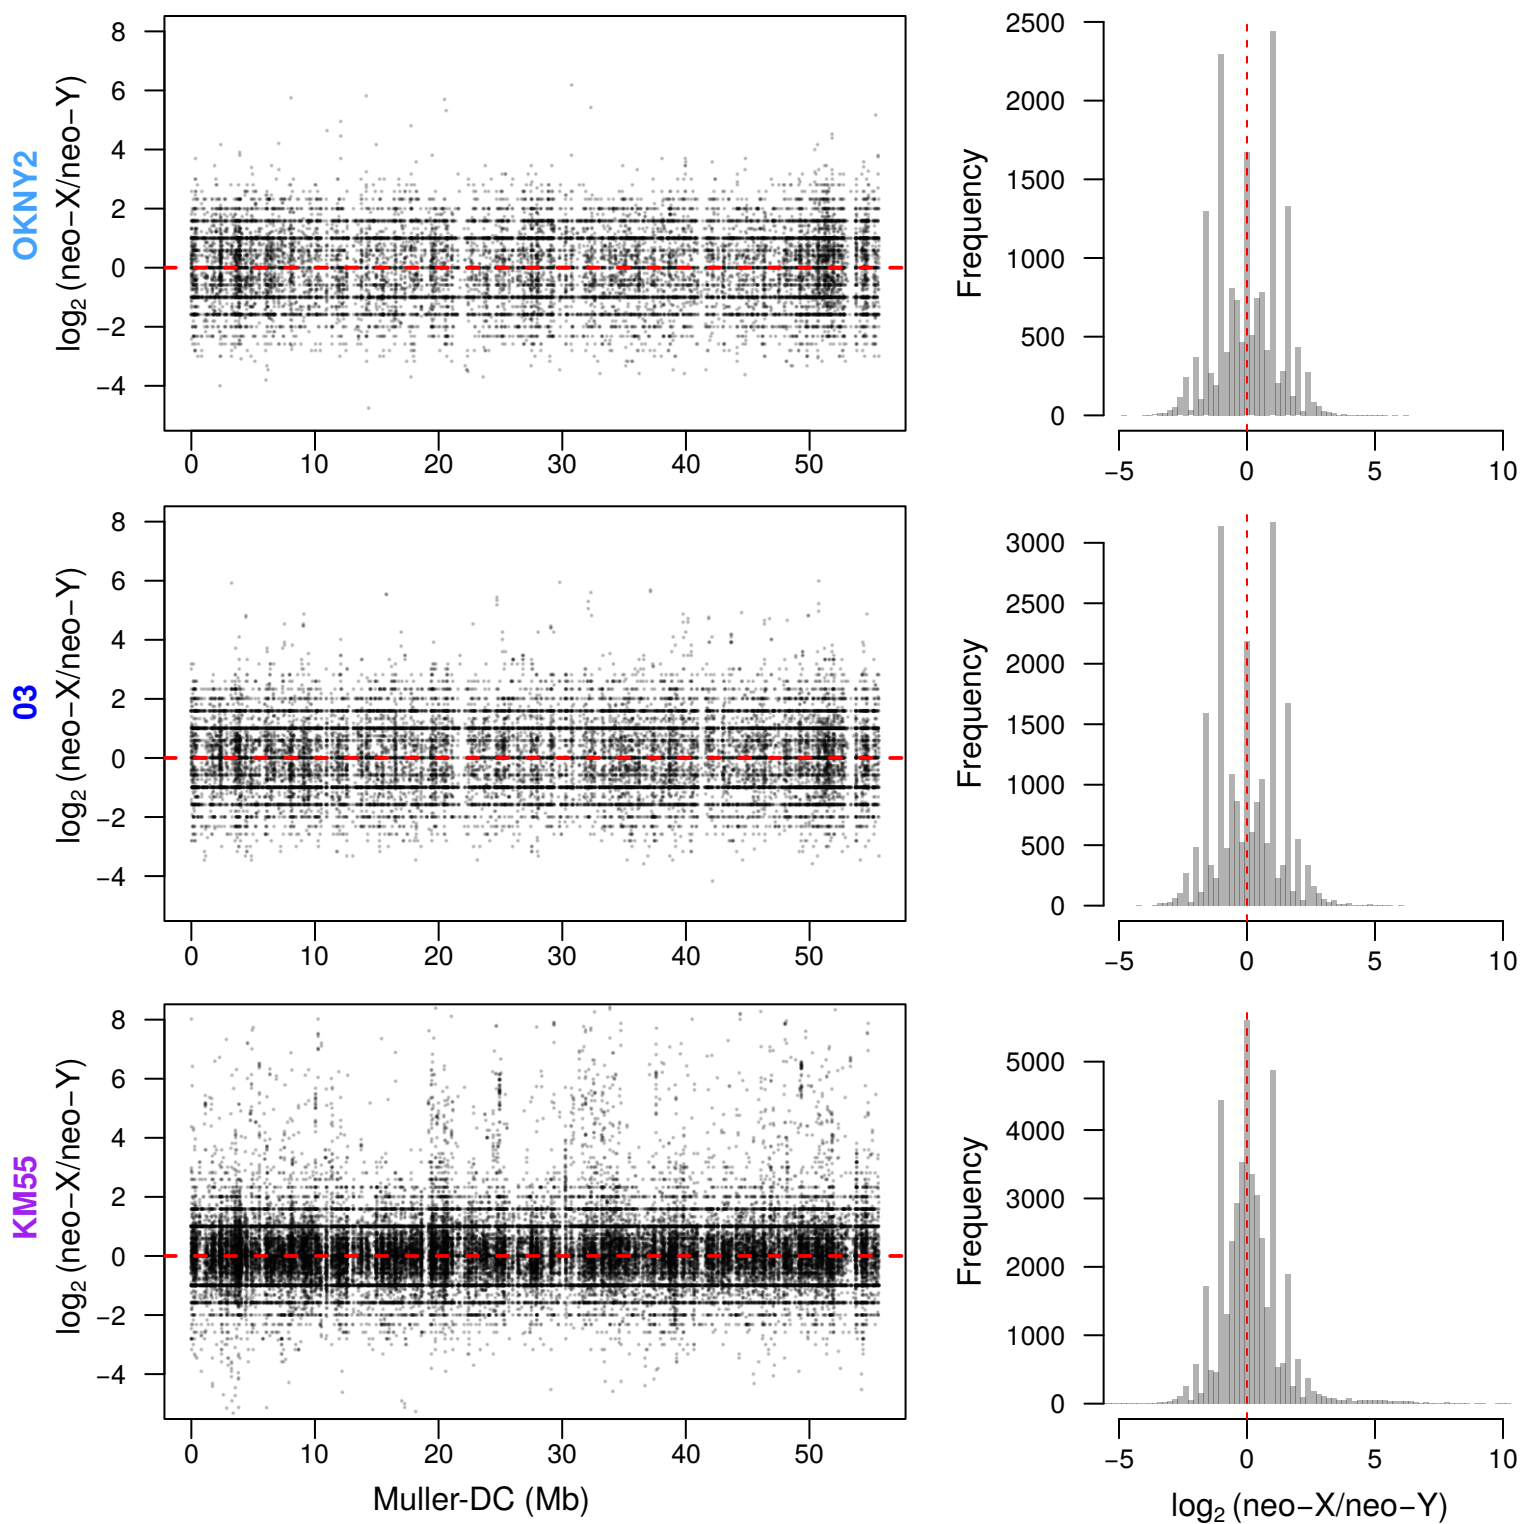

**S9 Fig.** Allele-specific differential expression at neo-X and neo-Y SNP sites. Left panels, allele-specific read counts over strain-specific SNP sites (points) differentiating the neo-X and neo-Y chromosomes were used to calculate the fold difference. Right panels, histograms of the distribution of the  $\log_2$  fold differences. Red lines demarcate the median fold difference.
