# Supplementary material for: Ancestral male recombination in Drosophila albomicans produced geographically restricted neo-Y chromosome haplotypes varying in age and onset of decay
Source: PubMed Central journal article supplement (PMC6897423; doi:10.1371/journal.pgen.1008502), 2019-11-18
Supplement: pgen.1008502.s017.pdf [file pgen.1008502.s017.pdf]

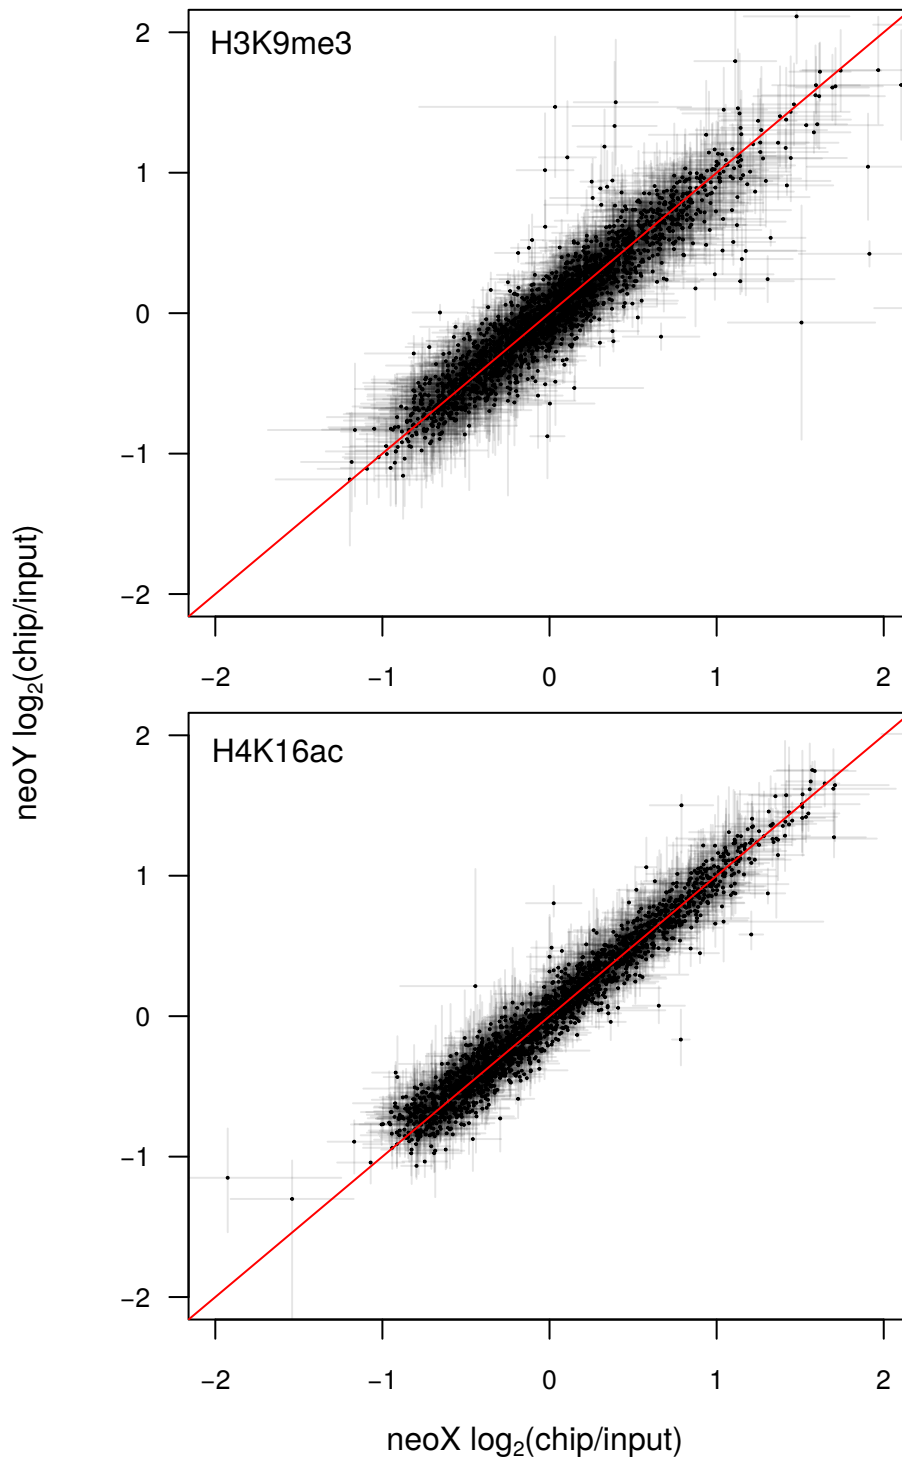

**S13 Fig.** Correlations of epigenetic mark enrichment on the neo-X and neo-Y. Red lines demarcate the identity lines ( $x=y$ )
