# Supplementary material for: Ancestral male recombination in Drosophila albomicans produced geographically restricted neo-Y chromosome haplotypes varying in age and onset of decay
Source: PubMed Central journal article supplement (PMC6897423; doi:10.1371/journal.pgen.1008502), 2019-11-18
Supplement: pgen.1008502.s018.pdf [file pgen.1008502.s018.pdf]

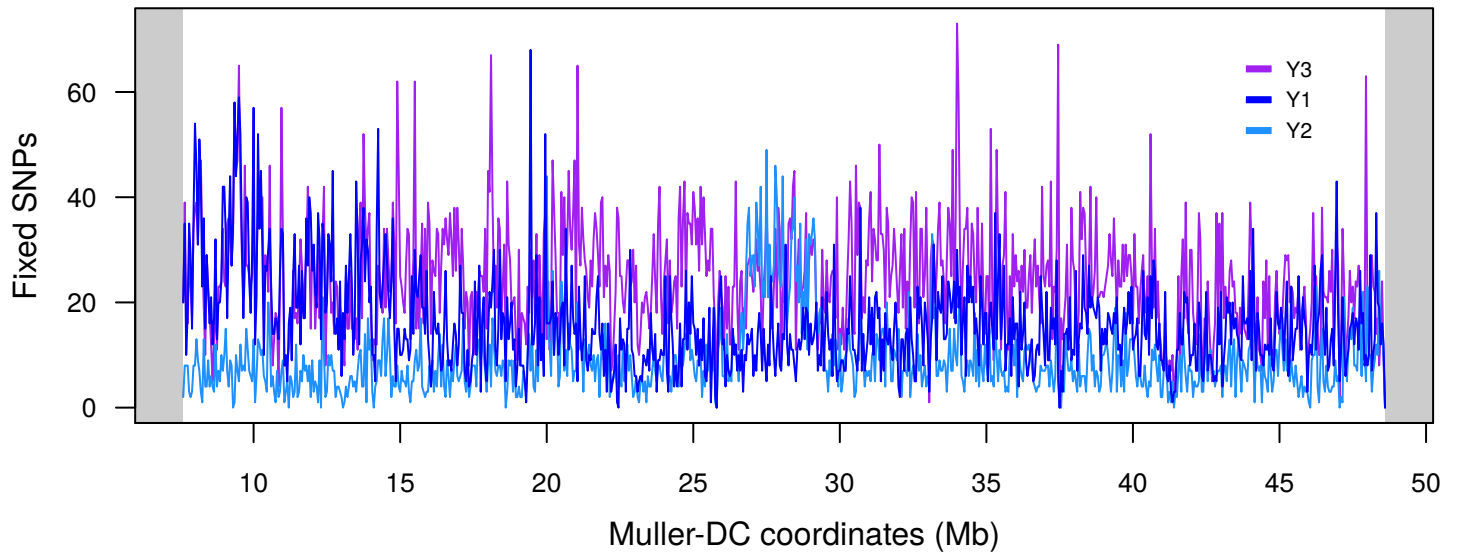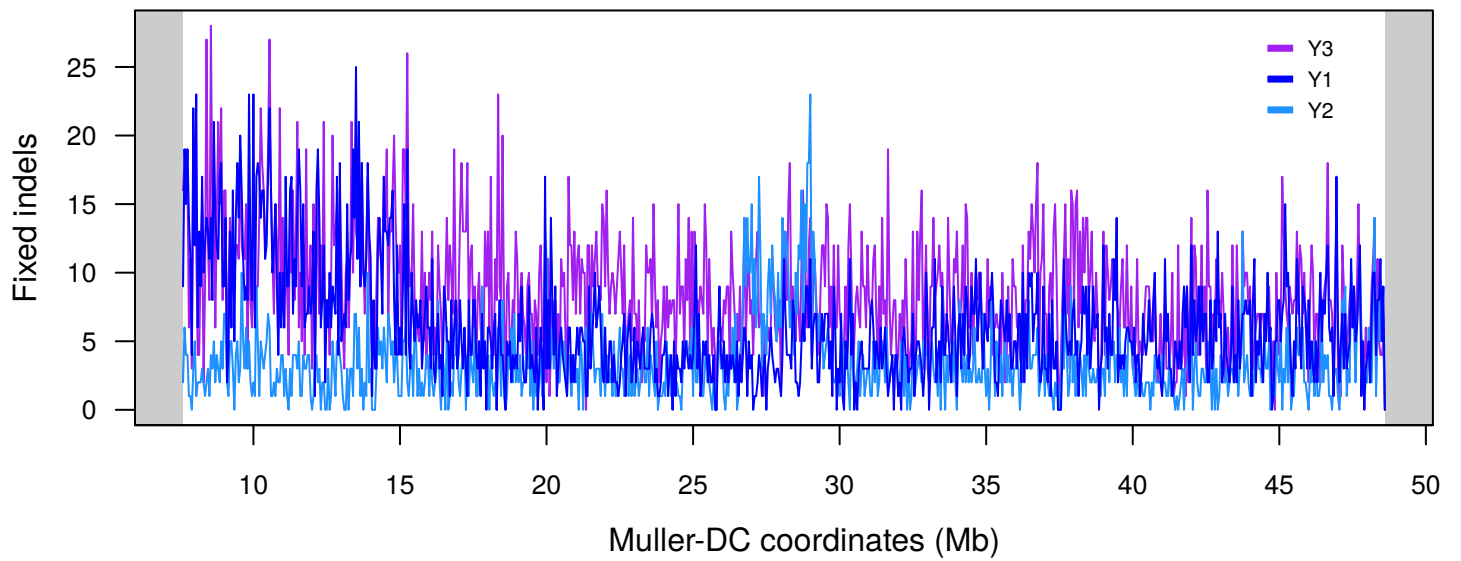

**S14 Fig.** Distribution of fixed derived SNPs (top) and indels (bottom) on the three neo-Y haplotypes: Y1 (blue), Y2 (light blue), Y3 (purple).
