# Supplementary material for: Ancestral male recombination in Drosophila albomicans produced geographically restricted neo-Y chromosome haplotypes varying in age and onset of decay
Source: PLoS Genet. 2019 Nov 18;15(11):e1008502. doi: 10.1371/journal.pgen.1008502 (PMC6897423; doi:10.1371/journal.pgen.1008502)
Supplement: S1 Table — (XLSX) [file pgen.1008502.s001.xlsx]

## Sheet: Sheet1
S1 Table. Sample information
Names	Sex	Species	Stock number	Stock source	Collection site	Data availability	Median autosomal Coverage	Sequence notes	Stock notes
d.alb.00	F	D. albomicans	15112-1751.00	NDSSC (UCSD/Cornell)	Okinawa, Japan	PRJNA554139	23.463
d.alb.00_M	M	D. albomicans	15112-1751.00	NDSSC (UCSD/Cornell)	Okinawa, Japan	PRJNA554143	15.053	DNA-seq
d.alb.01	F	D. albomicans	15112-1751.01	NDSSC (UCSD/Cornell)	Alishan, Taiwan	PRJNA554139	21.555
d.alb.02	F	D. albomicans	15112-1751.02	NDSSC (UCSD/Cornell)	Peng Hu, Taiwan	PRJNA554139	29.403
d.alb.03	F	D. albomicans	15112-1751.03	NDSSC (UCSD/Cornell)	Nankung, Taiwan	PRJNA554143	40.411	DNA-seq
d.alb.03_M	M	D. albomicans	15112-1751.03	NDSSC (UCSD/Cornell)	Nankung, Taiwan	PRJNA554143	22.38	DNA-seq, RNA-seq, ChIP-seq
d.alb.05	F	D. albomicans	15112-1751.05	NDSSC (UCSD/Cornell)	Ishigaki Island, Japan	PRJNA554139	23.183
d.alb.07	F	D. albomicans	15112-1751.07	NDSSC (UCSD/Cornell)	Chiang Doa, Thailand	PRJNA554139	13.88
d.alb.08	F	D. albomicans	15112-1751.08	NDSSC (UCSD/Cornell)	Chakkarat, Thailand	PRJNA554139	30.496
d.alb.E-10815_SHL48	F	D. albomicans	E-10815	Ehime Stock Center	Shilong, India	PRJNA554139	23.016
d.alb.E10862	F	D. albomicans	E-10862	Ehime Stock Center	Kyoto, Japan	PRJNA554139	21.096
d.alb.E10862_M	M	D. albomicans	E-10862	Ehime Stock Center	Kyoto, Japan	PRJNA554143	19.22	DNA-seq
d.alb.FKC20	F	D. albomicans	E-10826	Ehime Stock Center	Fukui, Japan	PRJNA554143	18.32	DNA-seq
d.alb.FKC20_M	M	D. albomicans	E-10826	Ehime Stock Center	Fukui, Japan	PRJNA554143	20.168	DNA-seq
d.alb.KM01-2	F	D. albomicans	E-10811	Ehime Stock Center	Okinawa, Japan	PRJNA554143	14.761	DNA-seq
d.alb.KM01-2_M	M	D. albomicans	E-10811	Ehime Stock Center	Okinawa, Japan	PRJNA554143	12.354	DNA-seq
d.alb.KM126	F	D. albomicans	-	Zhou & Bachtrog 2014	Kunming, China	PRJNA554139	11.095
d.alb.KM126_M	M	D. albomicans	-	Zhou & Bachtrog 2014	Kunming, China	PRJNA554139	19.3
d.alb.KM55	F	D. albomicans	-	Zhou & Bachtrog 2014	Kunming, China	PRJNA554139	10.508
d.alb.KM55_M	M	D. albomicans	-	Zhou & Bachtrog 2014	Kunming, China	PRJNA554139	14.56
d.alb.NG3	F	D. albomicans	-	Gift from E. Landeen	Nago, Japan	PRJNA554143	15.135	DNA-seq
d.alb.NG3_M	M	D. albomicans	-	Gift from E. Landeen	Nago, Japan	PRJNA554143	14.492	DNA-seq
d.alb.OKNY	F	D. albomicans	E-10821	Ehime Stock Center	Okinawa, Japan	PRJNA554143	14.204	DNA-seq
d.alb.OKNY_M	M	D. albomicans	E-10821	Ehime Stock Center	Okinawa, Japan	PRJNA554143	16.566	DNA-seq, RNAseq
d.alb.SHL2	F	D. albomicans	-	Zhang et al. 2015	Shilong, India	PRJNA554143	12.783	DNA-seq	Drived and inbred from of SHL48
d.alb.SHL2_M	M	D. albomicans	-	Zhang et al. 2016	Shilong, India	PRJNA554143	17.164	DNA-seq
d.alb.step13	F	D. albomicans	E-10861	Ehime Stock Center	Kyoto, Japan	PRJNA554143	14.369	DNA-seq
d.alb.step13_M	M	D. albomicans	E-10861	Ehime Stock Center	Kyoto, Japan	PRJNA554143	16.621	DNA-seq
d.kep.01	F	D. kepuluana	15112-1761.01	NDSSC (UCSD/Cornell)	Sarawak, Malaysia	PRJNA554139	7.41
d.kep.02	F	D. kepuluana	15112-1761.02	NDSSC (UCSD/Cornell)	Brunei, Borneo	PRJNA554139	25.482
d.kep.03	F	D. kepuluana	15112-1761.03	NDSSC (UCSD/Cornell)	Ulu Temburong, Borneo	PRJNA554139	43.752
d.nas.00	F	D. nasuta	15112-1781.00	NDSSC (UCSD/Cornell)	Mysore, India	PRJNA554139	40.915
d.nas.01	F	D. nasuta	15112-1781.01	NDSSC (UCSD/Cornell)	Sechelles Island, France	PRJNA554139	9.891
d.nas.02	F	D. nasuta	15112-1781.02	NDSSC (UCSD/Cornell)	Sechelles Island, France	PRJNA554139	30.7
d.nas.06	F	D. nasuta	15112-1781.06	NDSSC (UCSD/Cornell)	Mombasa, Kenya	PRJNA554139	15.633
d.nas.07	F	D. nasuta	15112-1781.07	NDSSC (UCSD/Cornell)	Mombasa, Kenya	PRJNA554139	26.352
d.nas.E19505	F	D. nasuta	E-19505	Ehime Stock Center	Sechelles Island, France	PRJNA554139	13.45
d.nas.G86	F	D. nasuta	E-19503	Ehime Stock Center	Mauritius Island, France	PRJNA554143	14.88	DNA-seq
d.nas.MBA31	F	D. nasuta	E-19502	Ehime Stock Center	Mombasa, Kenya	PRJNA554143	19.72	DNA-seq
d.nas.NHO4	F	D. nasuta	E-19504	Ehime Stock Center	Nagara hole, India	PRJNA554139	24.172
d.nas.SEZ11	F	D. nasuta	E-19505	Ehime Stock Center	Sechelles Island, France	PRJNA554139	16.463
d.nas.VNS23	F	D. nasuta	-	Gift from E. Landeen	Varanasi, India	PRJNA554143	13.44	DNA-seq	Labeled D. albomicans, but is actually D. nasuta since males do not have a neo-Y (based on coverage and SNP analyses).
d.nas.VNS23_M	M	D. nasuta	-	Gift from E. Landeen	Varanasi, India	PRJNA554143	11.464	DNA-seq
d.niv.LAE276	F	D. niveifrons	LAE276	Ehime Stock Center	Lae, Papua New Guinea	PRJNA554139	13.537
d.s.neo.00	F	D. s. neonasuta	15114-1861.00	NDSSC (UCSD/Cornell)	Mysore, India	PRJNA554139	14.125
d.s.sul.00	F	D. s. sulfurigaster	15112-1811.00	NDSSC (UCSD/Cornell)	Queensland, Australia	PRJNA554139	26.36
d.s.sul.01	F	D. s. sulfurigaster	15112-1811.01	NDSSC (UCSD/Cornell)	Ari Ksatr, Cambodia	PRJNA554139	31.07
